# Supplementary material for: Genetic Etiology Shared by Multiple Sclerosis and Ischemic Stroke
Source: Front Genet. 2020 Jul 3;11:646. doi: 10.3389/fgene.2020.00646 (PMC7348066; doi:10.3389/fgene.2020.00646)
Supplement: TABLE S3 — The expression data of shares gene sets from peripheral blood T-cells in multiple sclerosis patients and controls (Series GSE43591). [file Table_3.XLSX]

## Sheet: Sheet1
Table S3. The expression data of shares gene sets from peripheral blood T-cells in multiple sclerosis patients and controls. (Series GSE43591)
Gene	ID	P value	t	B	logFC
B4GALNT1	206435_at	0.0983	1.73	-4.855	0.0839
BRAP	41512_at	0.0144	-2.67	-3.18214	-0.161
CAMK2G	212757_s_at	3.09e-06	-6.3	4.67354	-0.44
CLEC2D	233500_x_at	0.0791	1.85	-4.67463	0.24
CLECL1	1561899_at	0.419	0.825	-5.927	0.0663
FOXP1	229844_at	0.0117	2.76	-3.00009	0.528
HECTD4	211034_s_at	0.0134	-2.7	-3.12221	-0.223
IL6	205207_at	0.499	0.688	-6.02887	0.027
LBH	221011_s_at	0.00056	-4.07	-0.18771	-0.553
LIME1	219541_at	0.00994	-2.84	-2.84958	-0.222
MICB	206247_at	0.205	-1.31	-5.43581	-0.149
NAA25	227245_at	0.0501	-2.08	-4.28584	-0.145
NFKBIL1	209973_at	0.631	-0.488	-6.14588	-0.0217
NUDT14	231910_at	0.809	-0.245	-6.23533	-0.0112
OS9	215399_s_at	0.858	0.181	-6.24899	0.0165
PDE4C	206792_x_at	0.201	-1.32	-5.41872	-0.165
RTEL1	206092_x_at	0.173	-1.41	-5.30777	-0.0765
RTEL1-TNFRSF6B	211526_s_at	0.00924	-2.87	-2.78363	-0.14
SLC2A4RG	218494_s_at	0.00129	-3.72	-0.9643	-0.332
SLC44A2	225175_s_at	0.0987	-1.73	-4.85841	-0.12
STAT4	206118_at	0.78	-0.284	-6.22504	-0.0399
TEC	206301_at	0.551	0.607	-6.08119	0.0231
ZBTB46	227358_at	0.717	-0.367	-6.19783	-0.015
ZGPAT	221848_at	0.000693	-3.98	-0.38663	-0.194
Significant genes (P<2.08E-03=0.05/24) with differential expression were in bold. logFC=log2-fold change.
