# Supplementary material for: Genetic Etiology Shared by Multiple Sclerosis and Ischemic Stroke
Source: Front Genet. 2020 Jul 3;11:646. doi: 10.3389/fgene.2020.00646 (PMC7348066; doi:10.3389/fgene.2020.00646)
Supplement: TABLE S4 — The expression data of shares gene sets from whole blood RNA in ischemic stroke patients and controls (Series GSE16561). [file Table_4.XLSX]

## Sheet: Sheet1
Table S4. The expression data of shares gene sets from whole blood RNA in ischemic stroke patients and controls. (Series GSE16561)
Gene	ID	P value	t	B	logFC
B4GALNT1	ILMN_1805725	0.348	0.945757	-6.04278	0.0751
BRAP	ILMN_1772034	0.413	0.822901	-6.14924	0.0701
CAMK2G	ILMN_1809695	0.581	0.553875	-6.3315	0.0431
CLEC2D	ILMN_1711702	2.68e-07	-5.71504	6.66446	-0.661
CLECL1	ILMN_1782729	0.294	-1.05831	-5.92474	-0.121
FOXP1	ILMN_1768248	0.0427	2.06519	-4.42689	0.15
HECTD4	—	—	—	—	—
IL6	ILMN_1699651	0.905	0.119632	-6.47615	0.0105
LBH	ILMN_2315979	5.45e-06	-4.93688	3.80164	-0.554
LIME1	ILMN_2183687	2.33e-07	-5.75022	6.79762	-0.67
MICB	ILMN_1708006	0.859	0.178348	-6.46748	0.0168
NAA25	ILMN_2077733	0.957	0.054405	-6.48177	0.00542
NFKBIL1	ILMN_2046344	0.221	1.23544	-5.72734	0.101
NUDT14	ILMN_1669788	0.009	-2.68934	-3.07378	-0.217
OS9	ILMN_2361807	0.000141	4.03546	0.73272	0.281
PDE4C	ILMN_2117613	0.24	1.18515	-5.78636	0.116
RTEL1	ILMN_1778629	0.253	1.15351	-5.83013	0.0851
RTEL1-TNFRSF6B	—	—	—	—	—
SLC2A4RG	ILMN_1740430	5.07e-05	-4.3281	1.69133	-0.246
SLC44A2	ILMN_1771987	0.000473	3.67381	-0.389318	0.362
STAT4	ILMN_1785202	0.00393	-2.98644	-2.33554	-0.408
TEC	ILMN_1666969	0.471	0.725597	-6.21526	0.0543
ZBTB46	ILMN_1710092	0.752	0.317853	-6.43319	0.027
ZGPAT	ILMN_1794643	0.0062	-2.82519	-2.74087	-0.195
Significant genes (P<2.08E-03=0.05/24) with differential expression were in bold. logFC=log2-fold change. “—”, data from the related GEO database are not available.
